# Supplementary material for: Biomineral Nano-Theranostic agent for Magnetic Resonance Image Guided, Augmented Radiofrequency Ablation of Liver Tumor
Source: PubMed Central journal article supplement (PMC5670219; doi:10.1038/s41598-017-14976-8), 2017-11-03
Supplement: 41598_2017_14976_MOESM1_ESM.pdf [file 41598_2017_14976_MOESM1_ESM.pdf]

## **Supporting Information**

### **Biomaterial Nano-Theranostic agent for Magnetic Resonance Image Guided, Augmented Radiofrequency Ablation of Liver Tumor**

Anusha Ashokan, Vijay Harish Somasundaram, Genekehal Siddaramana Gowd, Ida M Anna, Giridharan L Malarvizhi, Badrinathan Sridharan, Rupal B Jobanputra, Reshmi Peethambaran, A.K.K. Unni, Shantikumar Nair, Manzoor Koyakutty

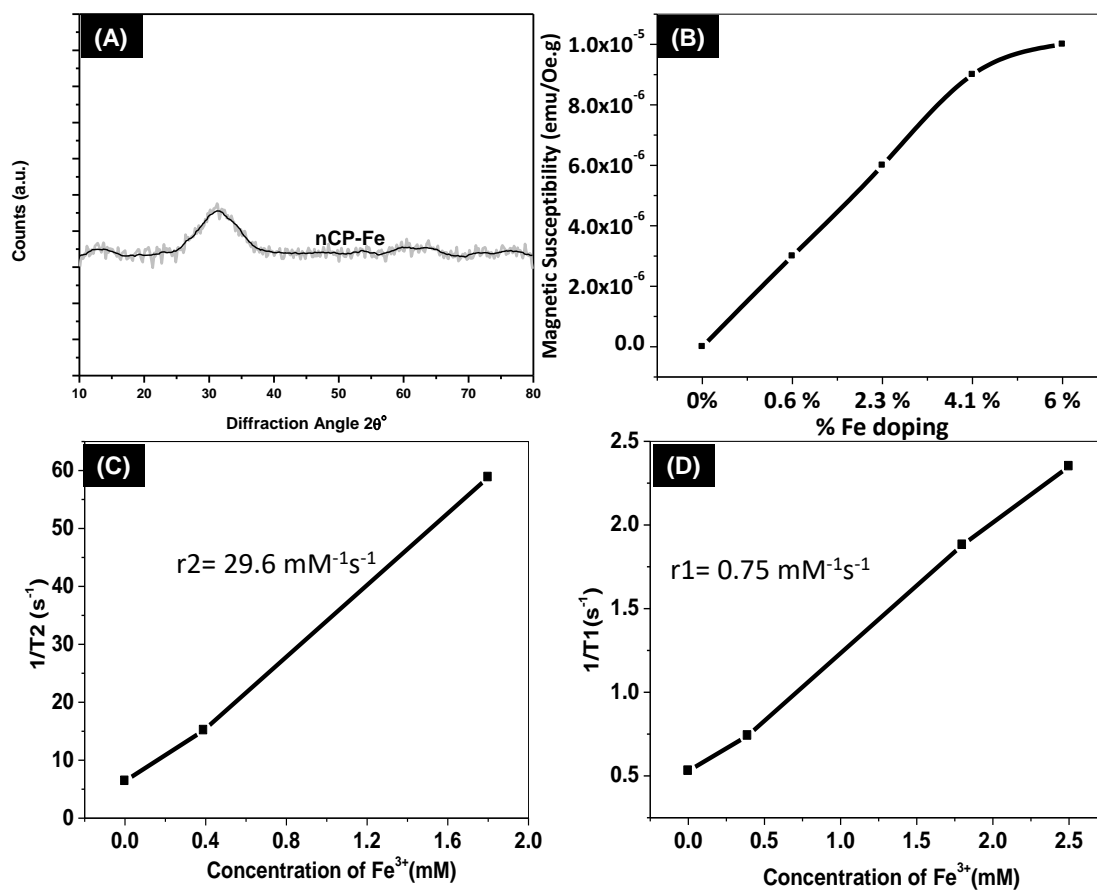

**Figure S1.** (A) XRD of nCP:Fe (B) Magnetic susceptibility data of different batches of nCP:Fe doped with varying concentration of  $Fe^{3+}$  (B)  $r_2$  and (C)  $r_1$  relaxivity plot of 4.1 at %  $Fe^{3+}$  doped nCP:Fe

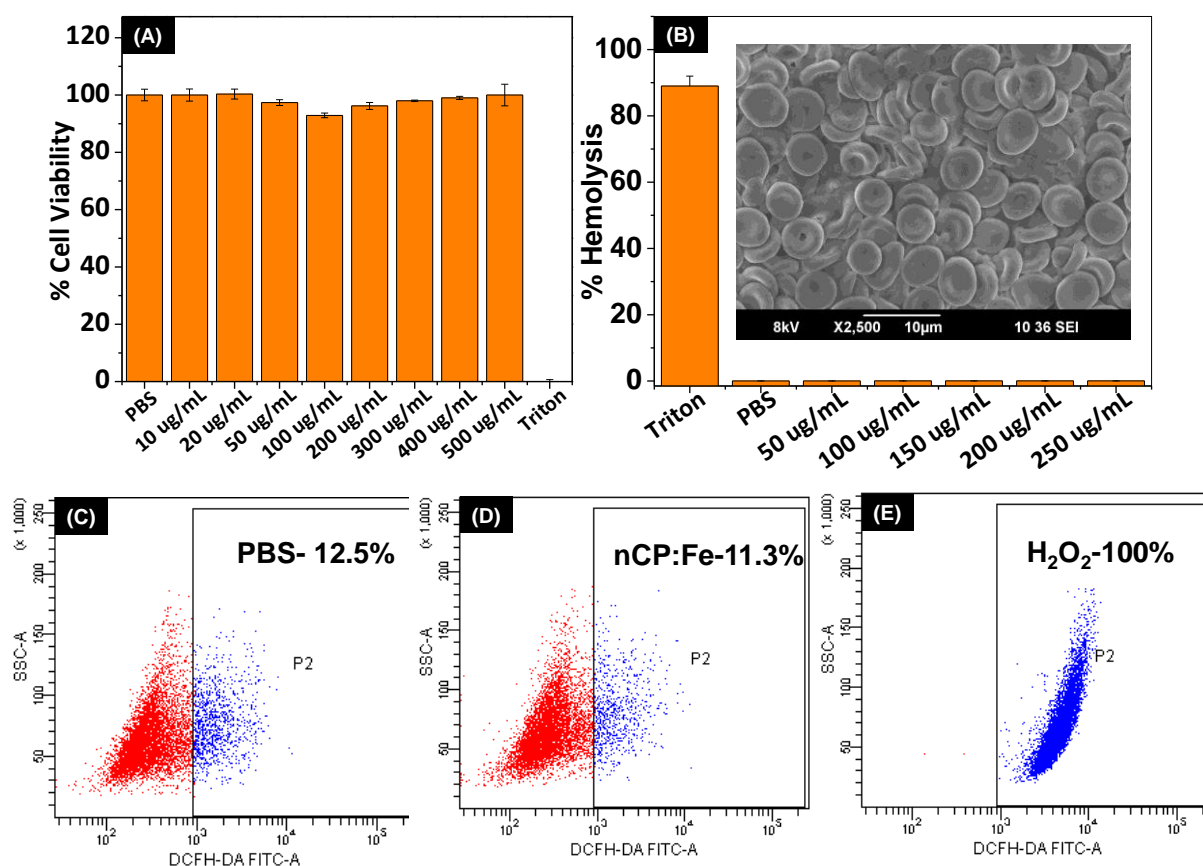

**Figure S2. *In vitro* toxicity analysis of nCP:Fe.** (A) Viability of PBMC after incubation with nCP:Fe for 48 hours (B) Hemolysis data after incubation of whole blood with nCP:Fe for 3 hours. Inset: SEM showing intact RBC membrane after nCP:Fe treatment. Flow cytometry based ROS analysis after treatment of N1S1 cells with (C) PBS (D) nCP:Fe and (E) H<sub>2</sub>O<sub>2</sub>.

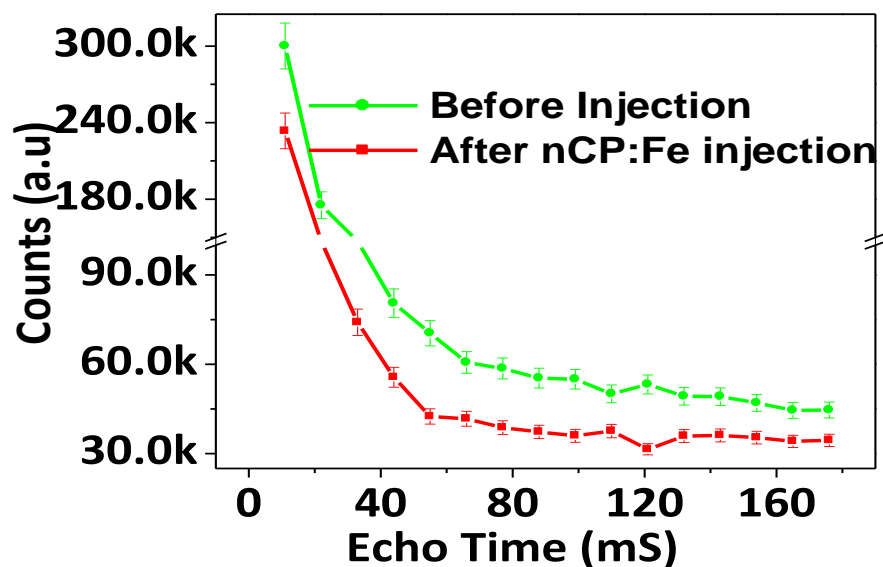

**Figure S3.** T2 mapping data averaging 3 ROI selected in the axial sections (as shown in Figure 2 C&D) before and 1 hour after nCP:Fe injection.

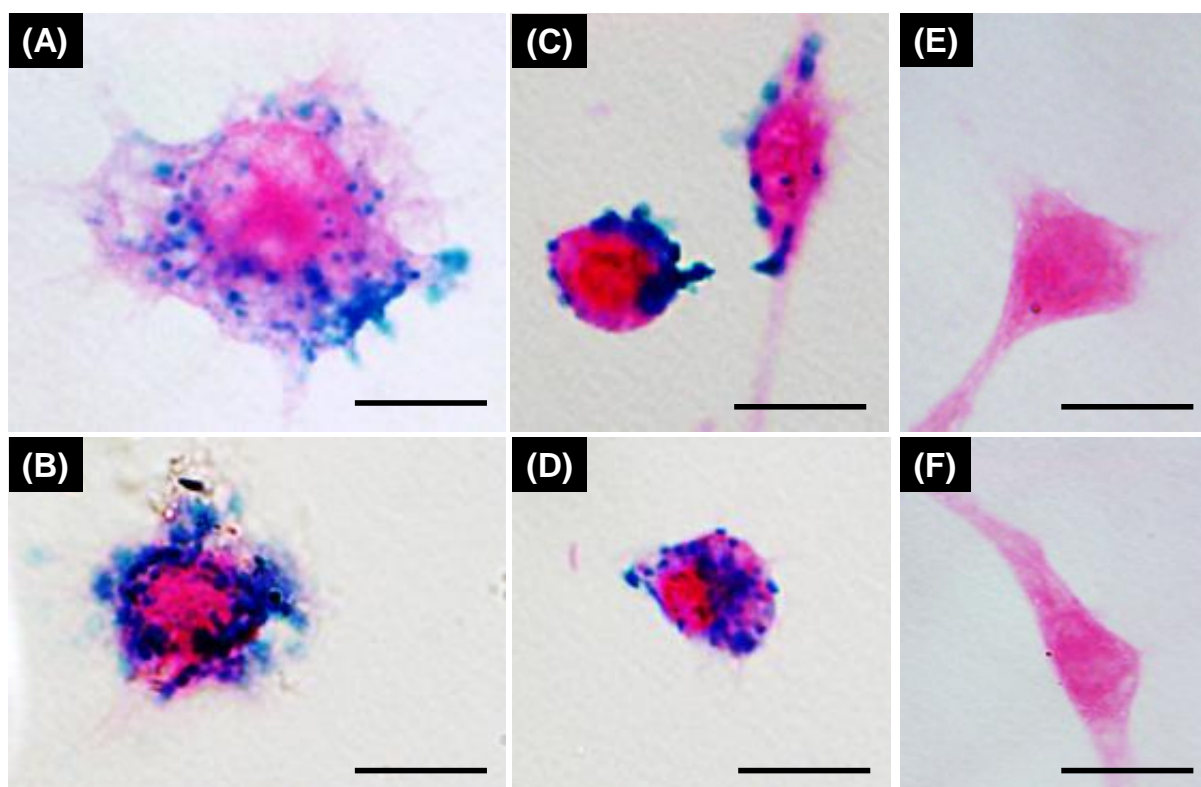

**Figure S4:** Prussian blue stained RAW 264.7 macrophages (A-D) after treatment with nCP:Fe for 12 hours (E,F) control cells without nanoparticle treatment. Bar represents 10  $\mu\text{m}$ .

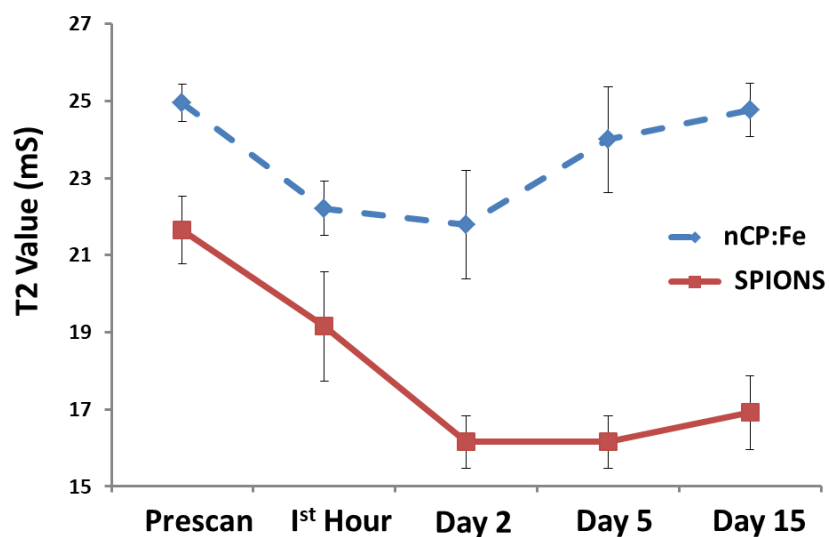

**Figure S5:** Comparison of T2 values in liver after intravenous injection of nCP:Fe vs SPIONS.

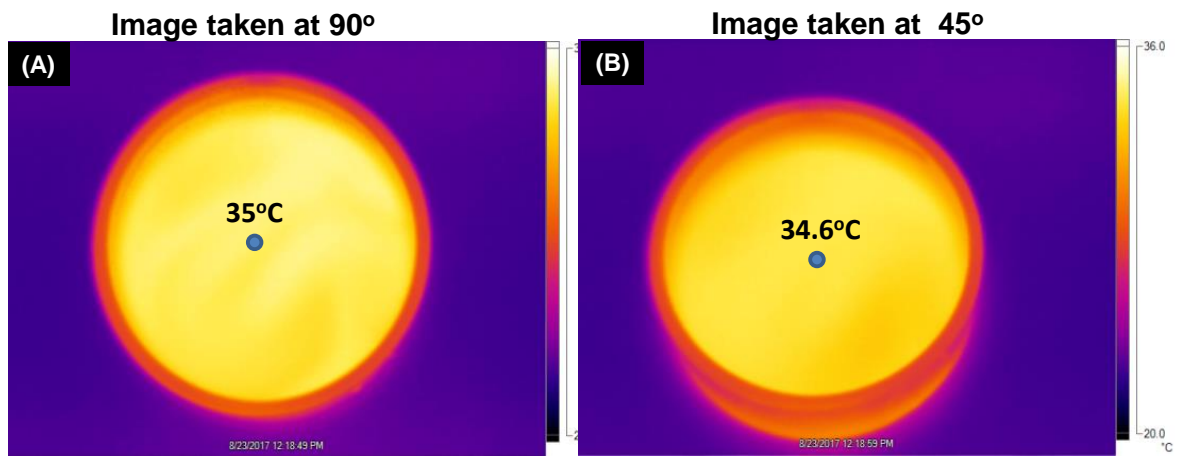

**Figure S6:** IR image and corresponding temperature of distilled water heated to 35°C.

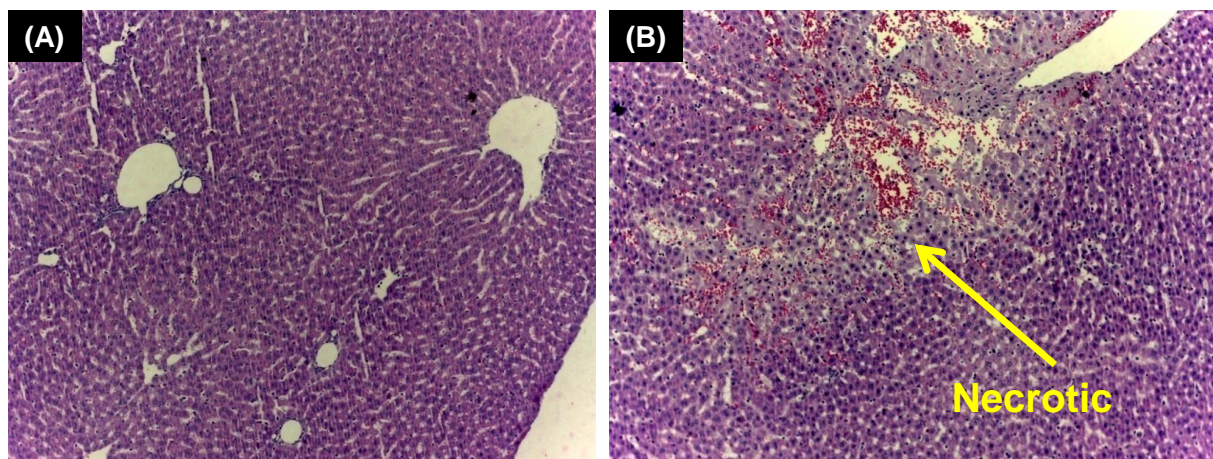

**Figure S7.** Histology sections of liver from animal injected with nCP:Fe (A) region not treated with RF (B) region exposed to RF showing necrosis
